# Supplementary material for: Persistently reduced humoral and cellular immune response following third SARS-CoV-2 mRNA vaccination in anti-CD20-treated multiple sclerosis patients
Source: medRxiv preprint, doi:10.1101/2022.01.27.22269944, version 1 (2022-01-28)
Supplement: Figure 2 legend [file 269944_file08.docx]

Figure 2 legend

Depicts levels of antibodies (Abs) given in BAU/mL- Y-axis with logarithmically scaled. BAU/ml = Binding antibody unit per ml. V1= Visit 1 (0-7 days before the 1st vaccine), V2= Visit 2 (0-7 days before the 2nd vaccine), V3 = Visit 3 (2-4 weeks after the 2nd vaccine dose), V4 = Visit 4 (0-7 days before the 3rd booster vaccine) and V5 = Visit 5 (2-4 weeks after the 3rd booster). Cut-offs are depicted with dotted lines. We defined seronegative (undetectable Abs) as < 7.1 BAU/mL, low levels of Abs as 7.1-17 BAU/mL, intermediate levels of Abs as 17-506 BAU/mL and high levels of Abs as > 506 BAU/mL.

Graph A: Ab-Levels after 1st vaccination and before 2nd vaccine at V2, after 2nd vaccine at V3, before 3rd booster at V4 and after the 3rd booster at V5. Each dot corresponds to the measured Ab-level.

Graph B: Outlines the Ab-development from V1-V5. All patients at V1 were seronegative.

Graph C: Depicts the mean of levels of Abs at each visit with standard error of mean. Lines demonstrates levels of significance (p-value) between visits in paired samples V2 vs V3 (p= 0.03)*, V3 vs V4 (p= 0.002)**, V3 vs V5 (p= ns) and V4 vs V5 (p=0.03)*.
