# Supplementary material for: Persistently reduced humoral and cellular immune response following third SARS-CoV-2 mRNA vaccination in anti-CD20-treated multiple sclerosis patients
Source: medRxiv preprint, doi:10.1101/2022.01.27.22269944, version 1 (2022-01-28)
Supplement: Figure 3 legend [file 269944_file09.docx]

Figure 3 legend

Graph A: Linear regression analysis of antibody levels 2-4 weeks after third vaccination in seropositive patients with time interval from the last ocrelizumab infusion. r2= 0.03779, p= 0.4395.

Graph B: Linear regression of antibody levels 2-4 weeks after third vaccination in seropositive patients with time interval between second and third vaccine. r2=0.00097, p=0.9.

BAU/ml = Binding antibody unit per ml.
