# Supplementary material for: Persistently reduced humoral and cellular immune response following third SARS-CoV-2 mRNA vaccination in anti-CD20-treated multiple sclerosis patients
Source: medRxiv preprint, doi:10.1101/2022.01.27.22269944, version 1 (2022-01-28)
Supplement: Figure 4 legend [file 269944_file10.docx]

Figure 4 legend

Scatter plot graph depicting frequencies of spike-reactive CD4+ and CD8+ cells mean with SEM at visit 1 (V1), visit 3 (V3) and visit 5 (V5). Y-axis in two segments from 0-1 × 109 cells/l and 2-6 × 109 cells/l.

V1= Visit 1 (0-7 days before the first vaccine), V3 = Visit 3 (2-4 weeks after the second vaccination), and V5 = Visit 5 (2-4 weeks after the third vaccination).

AIM = Activation-induced markers of positive T-cells

SEM = standard error of the mean
